# Supplementary material
Source: PubMed Central journal article supplement (PMC5835811)
Supplement: ajtr0010-0465-f6.pdf [file ajtr0010-0465-f6.pdf]

Treatment of ulcerative colitis using andrographolide

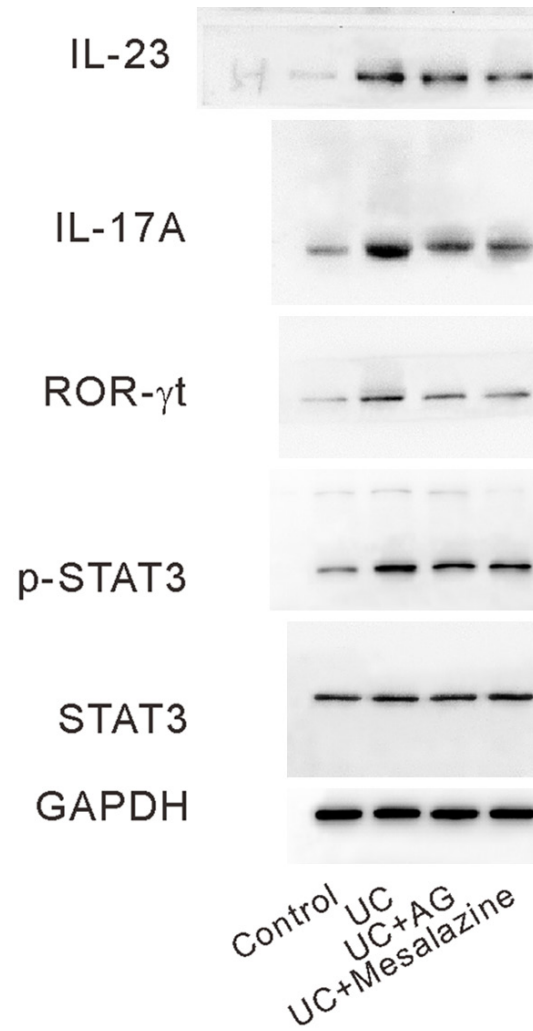

Figure S1. Original western images for Figure 3D.

# Treatment of ulcerative colitis using andrographolide

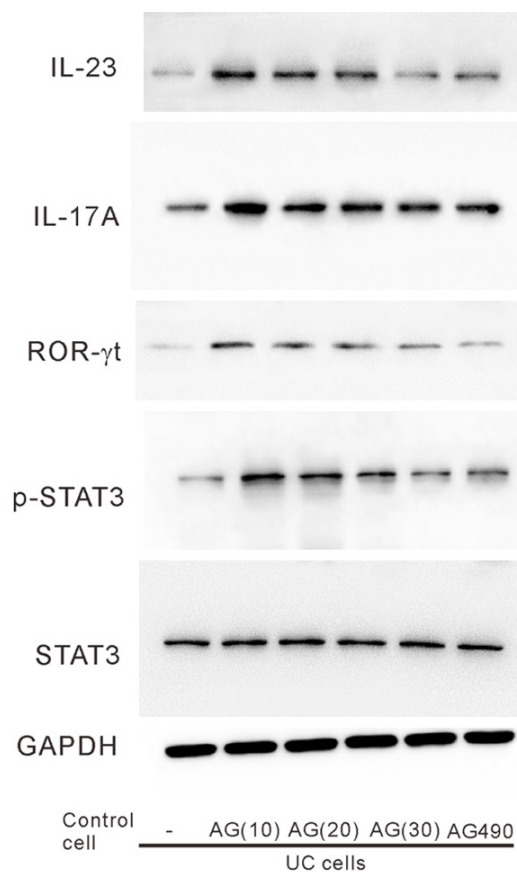

Figure S2. Original western images for Figure 4C.

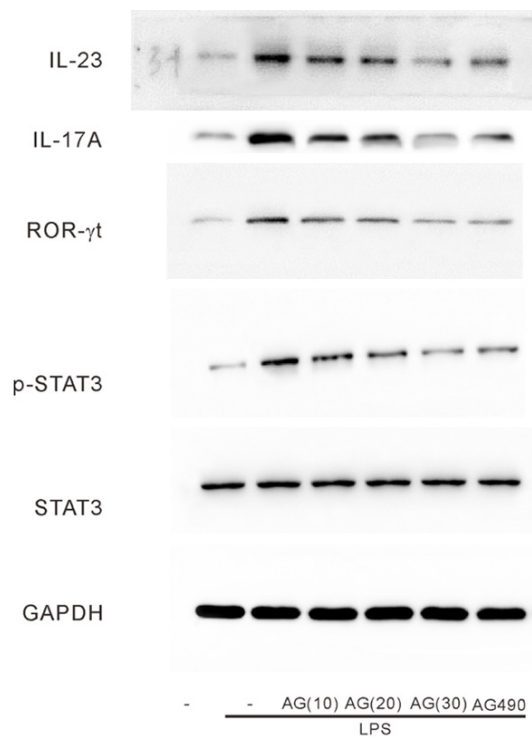

Figure S3. Original western images for Figure 5C.
